# Supplementary material for: Impacts of Mn, Fe, and Oxidative Stressors on MnSOD Activation by AtMTM1 and AtMTM2 in Arabidopsis
Source: MDPI journal article supplement (doi:10.3390/plants11050619), 2022-02-24
Supplement: s1 [file s1]

**Supplementary Table S1.** Primers for cloning, genotyping, RT-qPCR, and accession numbers of genes.

| Purpose                           | Sequence (5'→3')                         | Primer Set                         |
|-----------------------------------|------------------------------------------|------------------------------------|
| Construction of <i>AtMnSOD-OE</i> | <u>GAGCTC</u> TTTGGCGACCACTAGAAGGAGA     | <u>SacI</u> - <i>AtMnSOD-OE-Fw</i> |
|                                   | TCTAGA <u>AGCTGAGCTGGA</u> ACTGGTTCATCTC | <u>XbaI</u> - <i>AtMnSOD-OE-Rv</i> |
| Genotyping of <i>msd1</i>         | CGATTCGTTGTGTAGCGAG                      | <i>AtMnSOD-Fw</i> (LP)             |
|                                   | TTCAGTTGTTTTCTTCTCATAAAC                 | <i>AtMnSOD-Rv</i> (RP)             |
| T-DNA left border                 | ATTCAGTACATTA AAAACGTCCGCAAT             | BP                                 |
| RT-qPCR for <i>AtMTM1</i>         | AGAGGACTGTTTCATGGGAATGG                  | <i>AtMTM1-RT-qPCR-Fw</i>           |
|                                   | ATACTTGACCACTTCGTAGAAGGAAAC              | <i>AtMTM1-RT-qPCR-Rv</i>           |
| RT-qPCR for <i>AtMTM2</i>         | GAGCCATGACAATGACCACAAG                   | <i>AtMTM2-RT-qPCR-Fw</i>           |
|                                   | CTCTAGCCCCTGCTCCACTAAAC                  | <i>AtMTM2-RT-qPCR-Rv</i>           |
| RT-qPCR for <i>AtMnSOD</i>        | TGCCATTGACGCTCACTTTG                     | <i>AtMnSOD-RT-qPCR-Fw</i>          |
|                                   | TTGTCTAGTCCGAGCCACAC                     | <i>AtMnSOD-RT-qPCR-Rv</i>          |
| RT-qPCR for <i>AtAOX1A</i>        | GAATGTTCTGCTCCGGCTAT                     | <i>AtAOX1A-RT-qPCR-Fw</i>          |
|                                   | TCAGCACGAACAACCATCACA                    | <i>AtAOX1A-RT-qPCR-Rv</i>          |
| Internal control of RT-qPCR       | CCTGCGGTAATAACTGCATCT                    | <i>AtPP2A-RT-qPCR-Fw</i>           |
|                                   | CTTCACTTAGCTCCACCAAGCA                   | <i>AtPP2A-RT-qPCR-Rv</i>           |

Sequence data in this article can be found in the TAIR database under the following accession numbers: *AtAOX1A* (At3G22370), *AtMnSOD* (*AtMSD1*; At3G10920), *AtMTM1* (At4G27940), *AtMTM2* (At2G46320), *AtPP2A* (At1G13320), and *AtUBQ10* (At4G05320).

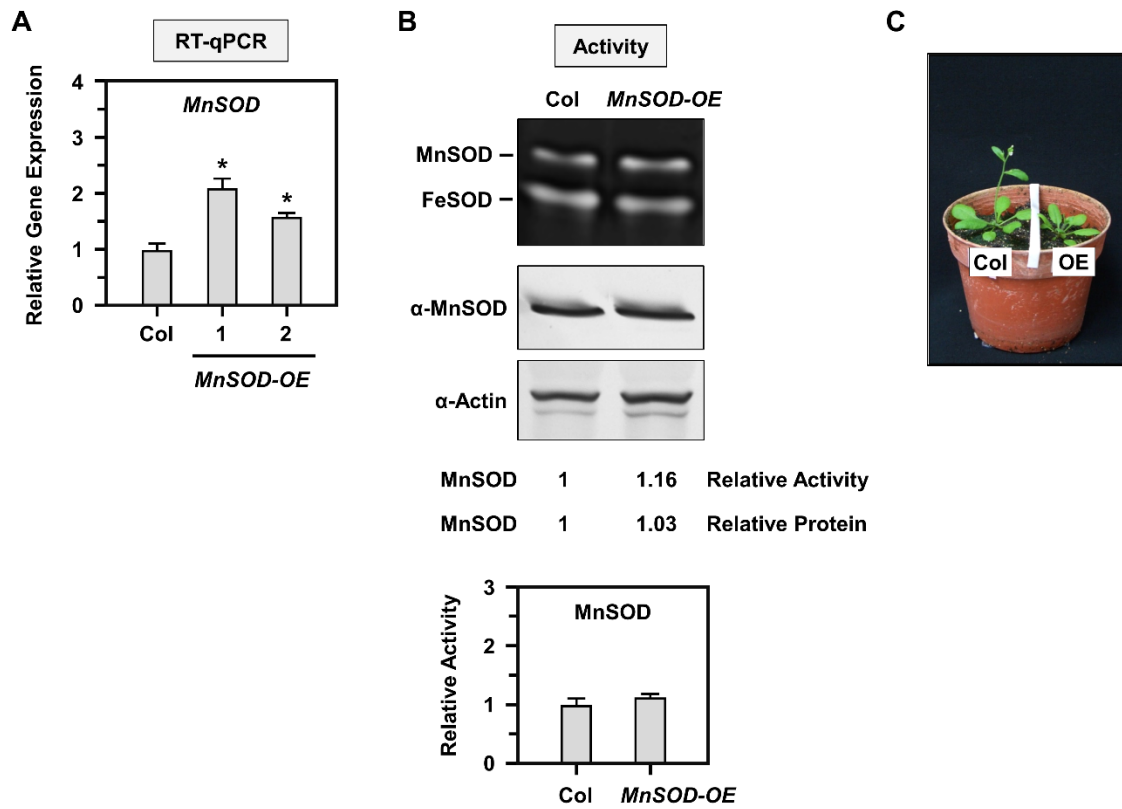

**Supplementary Figure S1.** Characterizations of *AtMnSOD*-overexpressing (*MnSOD-OE*) plant. **(A)** *AtMnSOD* gene expression in Col and *MnSOD-OE* seedlings was analyzed by RT-qPCR. *PP2A* was used as internal control. *AtMnSOD* gene expression level in *MnSOD-OE* was measured relative to that in Col. Data are mean  $\pm$  SD of three biological replicates. \* Significant at  $P < 0.05$ . **(B)** In-gel SOD activity assay (top) and immunoblotting with  $\alpha$ -MnSOD and  $\alpha$ -Actin antibodies (bottom). Actin was used as a loading control. MnSOD activity and protein levels in *MnSOD-OE* were measured relative to that in Col. **(D)** Late-flowering phenotype of one-month-old *MnSOD-OE* plant.

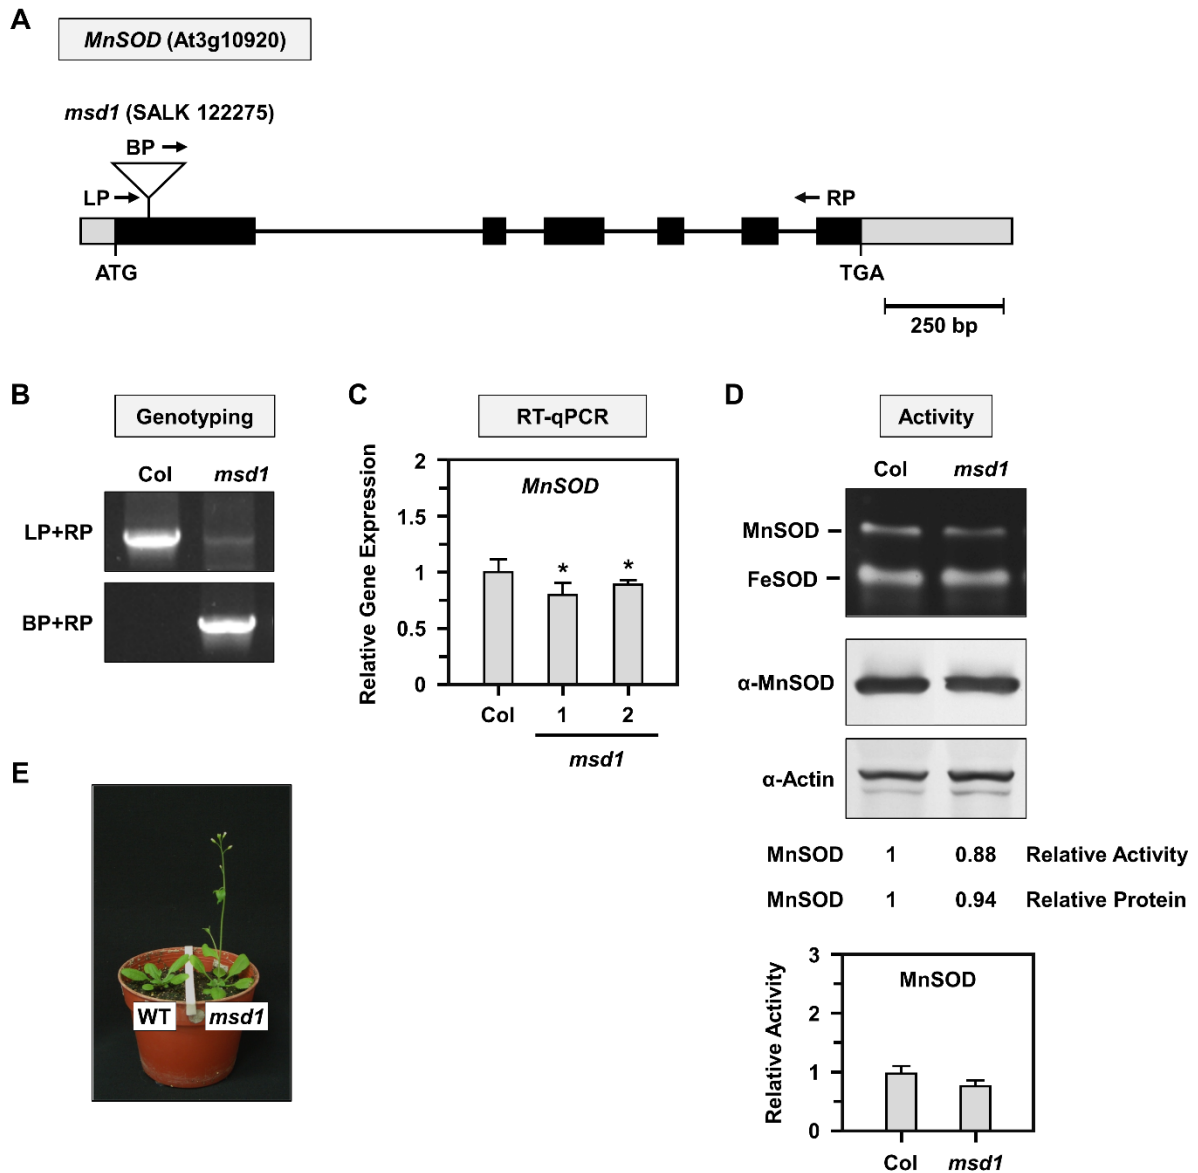

**Supplementary Figure S2.** Characterizations of *AtMnSOD* T-DNA knockdown (*msd1*) mutant. **(A)** Schematic map of *AtMnSOD* gene (At3G10920), T-DNA insertion site, and primers (arrows) used for genotyping. **(B)** Genotyping by PCR in *msd1* was performed with DNA flanking sequence primers (LP and RP) and T-DNA border primer (BP). **(C)** The *AtMnSOD* gene expression level in Col and *msd1* mutant was analyzed by RT-qPCR. *PP2A* was used as internal control. *AtMnSOD* gene expression level in *msd1* was measured relative to that in Col. Data are mean  $\pm$  SD of three biological replicates. \* Significant at  $P < 0.05$ . **(D)** In-gel SOD activity assay (top) and immunoblotting with  $\alpha$ -MnSOD and  $\alpha$ -Actin antibodies (middle and bottom). Actin was used as a loading control. MnSOD activity and protein levels in *msd1* were measured relative to that in Col. **(F)** Early-flowering phenotype of one-month-old *msd1* mutant.

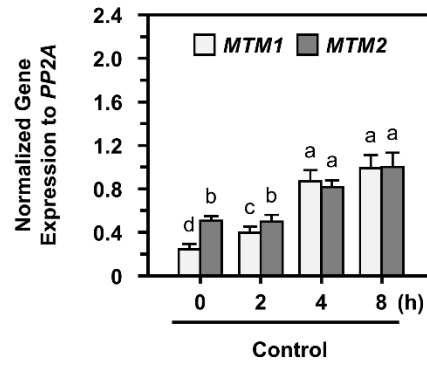

**Supplementary Figure S3.** Control experiment of *AtMTM1* and *AtMTM2* gene expression levels in Col. 14-day-old seedlings were incubated in 1/2 MS liquid medium without stressor treatment. *PP2A* was used as internal control. Data are mean  $\pm$  SD of three biological replicates. The statistical significances ( $P < 0.05$ ) are indicated as different letters (Duncan's multiple range test).
